# Supplementary material
Source: publisher site journal article supplement (https://www.dovepress.com/article/354705)
Supplement: Supplementary file 1 [file get_supplementary_file.php]

# SPUR (Social Psychological Usage Rational) PCA (Principal Component Analysis) Scree Plot

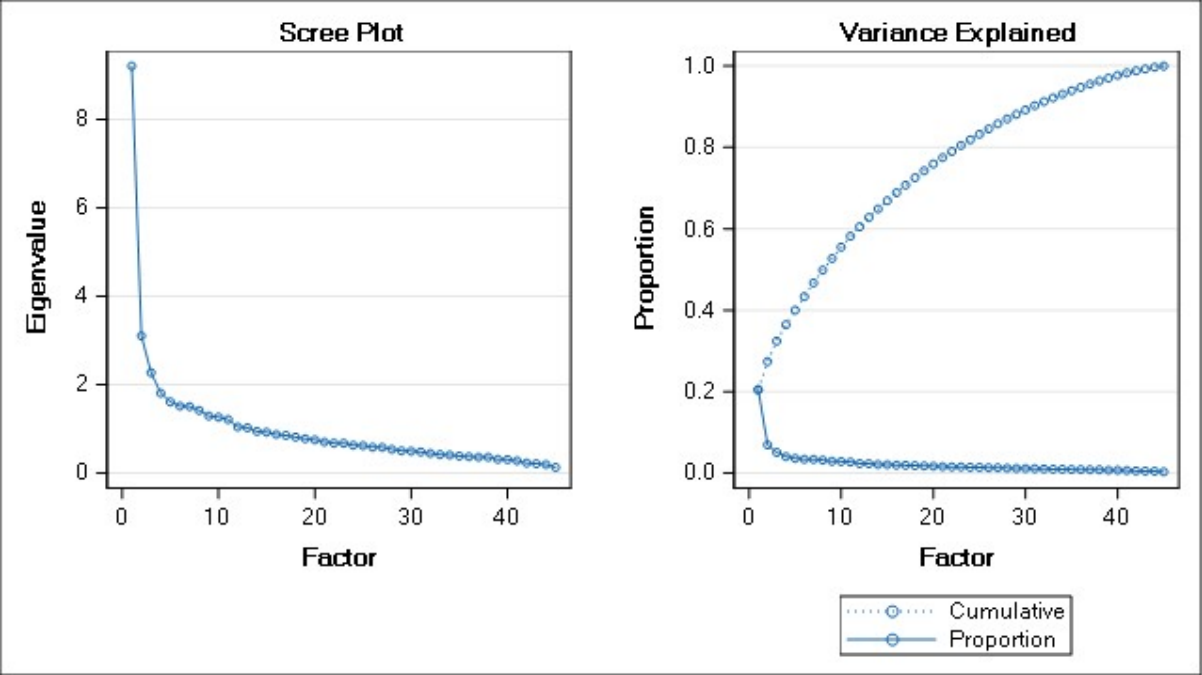

**THE OBSERVIA SPUR (Social Psychological Usage  
Rational) QUESTIONNAIRE**  
**Complete form - 45 items form**

**THE OBSERVIA TREATMENT BEHAVIOR QUESTIONNAIRE**

*For each sentence, please tick the box that best applied to you.*

---

**1. My [health problem] affects my relationships with those I care about.**

                                                                                      

1                                      2                                      3                                      4                                      5

I strongly disagree

I strongly agree

---

**2. My [health problem] affects my social life.**

                                                                                      

1                                      2                                      3                                      4                                      5

I strongly disagree

I strongly agree

---

**3. I would be interested in knowing if others with [health problem] follow their treatment plan.**

                                                                                      

1                                      2                                      3                                      4                                      5

I strongly disagree

I strongly agree

---

**4. I think that people with [health problem] generally follow their doctors' prescription exactly.**

                                                                                      

1                                      2                                      3                                      4                                      5

I strongly disagree

I strongly agree

---

**5. The people in my life help me manage my [health problem].**

                                                                                      

1                                      2                                      3                                      4                                      5

I strongly disagree

I strongly agree

---

---

**6. Fighting for my health is my highest priority.**

1

2

3

4

5

I strongly disagree

I strongly agree

---

**7. Precisely following doctors' recommendations is the best way for me to stay healthy.**

1

2

3

4

5

I strongly disagree

I strongly agree

---

**8. I trust doctors' recommendations.**

1

2

3

4

5

I strongly disagree

I strongly agree

---

**9. It is essential that I follow my treatment plan.**

1

2

3

4

5

I strongly disagree

I strongly agree

---

**10. Sometimes my [health problem] seems unreal to me.**

1

2

3

4

5

I strongly disagree

I strongly agree

---

**11. I'm the kind of person who will follow their treatment plan exactly.**

1

2

3

4

5

I strongly disagree

I strongly agree

---

**12. I will have to take a treatment for my [health problem] for the rest of my life.**

1

2

3

4

5

I strongly disagree

I strongly agree

---

**13. I live in the moment.**

1

2

3

4

5

I strongly disagree

I strongly agree

---

---

**14. If my doctor recommends that I do something, I do it.**

1

2

3

4

5

I strongly disagree

I strongly agree

---

**15. Sometimes doctors prescribe treatment you don't really need.**

1

2

3

4

5

I strongly disagree

I strongly agree

---

**16. Sometimes I don't follow my treatment plan exactly.**

1

2

3

4

5

I strongly disagree

I strongly agree

---

**17. I find it easy to get my treatment for my [health problem].**

1

2

3

4

5

I strongly disagree

I strongly agree

---

**18. I can easily pay for my treatment.**

1

2

3

4

5

I strongly disagree

I strongly agree

---

**19. I am able to follow my treatment plan.**

1

2

3

4

5

I strongly disagree

I strongly agree

---

**20. Too many doctors don't listen to what patients tell them.**

1

2

3

4

5

I strongly disagree

I strongly agree

---

**21. My [health problem] has led to financial problems.**

1

2

3

4

5

I strongly disagree

I strongly agree

---

---

**22. I find it easy to follow my treatment plan when I am not at home.**

1

2

3

4

5

I strongly disagree

I strongly agree

---

**23. I am satisfied with the level of information I have about my treatment.**

1

2

3

4

5

I strongly disagree

I strongly agree

---

**24. I find it easy to manage the different medications I take.**

1

2

3

4

5

I strongly disagree

I strongly agree

---

**25. I find it easy to take my medication for my [health problem].**

1

2

3

4

5

I strongly disagree

I strongly agree

---

**26. I am worried about the side effects of some medications.**

1

2

3

4

5

I strongly disagree

I strongly agree

---

**27. I believe I can stop my treatment for my [health problem] when I feel better.**

1

2

3

4

5

I strongly disagree

I strongly agree

---

**28. I am worried about taking medications.**

1

2

3

4

5

I strongly disagree

I strongly agree

---

**29. My [health problem] should be taken seriously.**

1

2

3

4

5

I strongly disagree

I strongly agree

---

---

**30. I am able to exercise despite my [health problem].**

|                          |                          |                          |                          |                          |
|--------------------------|--------------------------|--------------------------|--------------------------|--------------------------|
| <input type="checkbox"/> |
| 1                        | 2                        | 3                        | 4                        | 5                        |

I strongly disagree

I strongly agree

---

**31. My treatment affects my sex life.**

|                          |                          |                          |                          |                          |
|--------------------------|--------------------------|--------------------------|--------------------------|--------------------------|
| <input type="checkbox"/> |
| 1                        | 2                        | 3                        | 4                        | 5                        |

I strongly disagree

I strongly agree

---

**32. I am satisfied with the level of information I have about my [health problem].**

|                          |                          |                          |                          |                          |
|--------------------------|--------------------------|--------------------------|--------------------------|--------------------------|
| <input type="checkbox"/> |
| 1                        | 2                        | 3                        | 4                        | 5                        |

I strongly disagree

I strongly agree

---

**33. I completely understand my [health problem].**

|                          |                          |                          |                          |                          |
|--------------------------|--------------------------|--------------------------|--------------------------|--------------------------|
| <input type="checkbox"/> |
| 1                        | 2                        | 3                        | 4                        | 5                        |

I strongly disagree

I strongly agree

---

**34. I don't like taking medications.**

|                          |                          |                          |                          |                          |
|--------------------------|--------------------------|--------------------------|--------------------------|--------------------------|
| <input type="checkbox"/> |
| 1                        | 2                        | 3                        | 4                        | 5                        |

I strongly disagree

I strongly agree

---

**35. Medications for my [health problem] don't do anything for me.**

|                          |                          |                          |                          |                          |
|--------------------------|--------------------------|--------------------------|--------------------------|--------------------------|
| <input type="checkbox"/> |
| 1                        | 2                        | 3                        | 4                        | 5                        |

I strongly disagree

I strongly agree

---

**36. My treatment helps my [health problem].**

|                          |                          |                          |                          |                          |
|--------------------------|--------------------------|--------------------------|--------------------------|--------------------------|
| <input type="checkbox"/> |
| 1                        | 2                        | 3                        | 4                        | 5                        |

I strongly disagree

I strongly agree

---

**37. There is no point in taking medications for my [health problem].**

|                          |                          |                          |                          |                          |
|--------------------------|--------------------------|--------------------------|--------------------------|--------------------------|
| <input type="checkbox"/> |
| 1                        | 2                        | 3                        | 4                        | 5                        |

I strongly disagree

I strongly agree

---

---

**38. What I do impacts my [health problem].**

1

2

3

4

5

I strongly disagree

I strongly agree

---

**39. My [health problem] is likely to get worse if I don't follow my treatment plan.**

1

2

3

4

5

I strongly disagree

I strongly agree

---

**40. I feel worse if I don't follow my treatment plan.**

1

2

3

4

5

I strongly disagree

I strongly agree

---

**41. Medications are more expensive than they should be.**

1

2

3

4

5

I strongly disagree

I strongly agree

---

**42. My [health problem] keeps me from doing things I want to do.**

1

2

3

4

5

I strongly disagree

I strongly agree

---

**43. Following my [health problem] treatment plan lets me do the things I want to do.**

1

2

3

4

5

I strongly disagree

I strongly agree

---

**44. Non-traditional treatments could replace some of my medications.**

1

2

3

4

5

I strongly disagree

I strongly agree

---

**45. I have found ways to deal with my [health problem].**

1

2

3

4

5

I strongly disagree

I strongly agree

---

# THE OBSERVIA SPUR QUESTIONNAIRE

## Long form - 24 items

### THE OBSERVIA TREATMENT BEHAVIOR QUESTIONNAIRE

*For each sentence, please tick the box that best applied to you.*

---

**1. My [health problem] affects my relationships with those I care about.**

|                          |                          |                          |                          |                          |
|--------------------------|--------------------------|--------------------------|--------------------------|--------------------------|
| <input type="checkbox"/> |
| 1                        | 2                        | 3                        | 4                        | 5                        |

I strongly disagree

I strongly agree

---

**2. My [health problem] affects my social life.**

|                          |                          |                          |                          |                          |
|--------------------------|--------------------------|--------------------------|--------------------------|--------------------------|
| <input type="checkbox"/> |
| 1                        | 2                        | 3                        | 4                        | 5                        |

I strongly disagree

I strongly agree

---

**6. Fighting for my health is my highest priority.**

|                          |                          |                          |                          |                          |
|--------------------------|--------------------------|--------------------------|--------------------------|--------------------------|
| <input type="checkbox"/> |
| 1                        | 2                        | 3                        | 4                        | 5                        |

I strongly disagree

I strongly agree

---

**7. Precisely following doctors' recommendations is the best way for me to stay healthy.**

|                          |                          |                          |                          |                          |
|--------------------------|--------------------------|--------------------------|--------------------------|--------------------------|
| <input type="checkbox"/> |
| 1                        | 2                        | 3                        | 4                        | 5                        |

I strongly disagree

I strongly agree

---

**8. I trust doctors' recommendations.**

|                          |                          |                          |                          |                          |
|--------------------------|--------------------------|--------------------------|--------------------------|--------------------------|
| <input type="checkbox"/> |
| 1                        | 2                        | 3                        | 4                        | 5                        |

I strongly disagree

I strongly agree

---

**9. It is essential that I follow my treatment plan.**

|                          |                          |                          |                          |                          |
|--------------------------|--------------------------|--------------------------|--------------------------|--------------------------|
| <input type="checkbox"/> |
| 1                        | 2                        | 3                        | 4                        | 5                        |

I strongly disagree

I strongly agree

---



---

**13. I live in the moment.**

1

2

3

4

5

I strongly disagree

I strongly agree

---

**14. If my doctor recommends that I do something, I do it.**

1

2

3

4

5

I strongly disagree

I strongly agree

---

**15. Sometimes doctors prescribe treatment you don't really need.**

1

2

3

4

5

I strongly disagree

I strongly agree

---

**16. Sometimes I don't follow my treatment plan exactly.**

1

2

3

4

5

I strongly disagree

I strongly agree

---

**17. I find it easy to get my treatment for my [health problem].**

1

2

3

4

5

I strongly disagree

I strongly agree

---

**18. I can easily pay for my treatment.**

1

2

3

4

5

I strongly disagree

I strongly agree

---

**19. I am able to follow my treatment plan.**

1

2

3

4

5

I strongly disagree

I strongly agree

---

**21. My [health problem] has led to financial problems.**

1

2

3

4

5

I strongly disagree

I strongly agree

---

---

**22. I find it easy to follow my treatment plan when I am not at home.**

|                          |                          |                          |                          |                          |
|--------------------------|--------------------------|--------------------------|--------------------------|--------------------------|
| <input type="checkbox"/> |
| 1                        | 2                        | 3                        | 4                        | 5                        |

I strongly disagree

I strongly agree

---

**24. I find it easy to manage the different medications I take.**

|                          |                          |                          |                          |                          |
|--------------------------|--------------------------|--------------------------|--------------------------|--------------------------|
| <input type="checkbox"/> |
| 1                        | 2                        | 3                        | 4                        | 5                        |

I strongly disagree

I strongly agree

---

**27. I believe I can stop my treatment for my [health problem] when I feel better.**

|                          |                          |                          |                          |                          |
|--------------------------|--------------------------|--------------------------|--------------------------|--------------------------|
| <input type="checkbox"/> |
| 1                        | 2                        | 3                        | 4                        | 5                        |

I strongly disagree

I strongly agree

---

**28. I am worried about taking medications.**

|                          |                          |                          |                          |                          |
|--------------------------|--------------------------|--------------------------|--------------------------|--------------------------|
| <input type="checkbox"/> |
| 1                        | 2                        | 3                        | 4                        | 5                        |

I strongly disagree

I strongly agree

---

**29. My [health problem] should be taken seriously.**

|                          |                          |                          |                          |                          |
|--------------------------|--------------------------|--------------------------|--------------------------|--------------------------|
| <input type="checkbox"/> |
| 1                        | 2                        | 3                        | 4                        | 5                        |

I strongly disagree

I strongly agree

---

**33. I completely understand my [health problem].**

|                          |                          |                          |                          |                          |
|--------------------------|--------------------------|--------------------------|--------------------------|--------------------------|
| <input type="checkbox"/> |
| 1                        | 2                        | 3                        | 4                        | 5                        |

I strongly disagree

I strongly agree

---

**36. My treatment helps my [health problem].**

|                          |                          |                          |                          |                          |
|--------------------------|--------------------------|--------------------------|--------------------------|--------------------------|
| <input type="checkbox"/> |
| 1                        | 2                        | 3                        | 4                        | 5                        |

I strongly disagree

I strongly agree

---

**37. There is no point in taking medications for my [health problem].**

|                          |                          |                          |                          |                          |
|--------------------------|--------------------------|--------------------------|--------------------------|--------------------------|
| <input type="checkbox"/> |
| 1                        | 2                        | 3                        | 4                        | 5                        |

I strongly disagree

I strongly agree

---

---

**39. My [health problem] is likely to get worse if I don't follow my treatment plan.**

1

2

3

4

5

I strongly disagree

I strongly agree

---

**42. My [health problem] keeps me from doing things I want to do.**

1

2

3

4

5

I strongly disagree

I strongly agree

---

# THE OBSERVIA SPUR QUESTIONNAIRE

## Intermediate form - 17 items

### THE OBSERVIA TREATMENT BEHAVIOR QUESTIONNAIRE

For each sentence, please tick the box that best applied to you.

---

**1. My [health problem] affects my relationships with those I care about.**

                                                                                      

1                                      2                                      3                                      4                                      5

I strongly disagree

I strongly agree

---

**2. My [health problem] affects my social life.**

                                                                                      

1                                      2                                      3                                      4                                      5

I strongly disagree

I strongly agree

---

**6. Fighting for my health is my highest priority.**

                                                                                      

1                                      2                                      3                                      4                                      5

I strongly disagree

I strongly agree

---

**9. It is essential that I follow my treatment plan.**

                                                                                      

1                                      2                                      3                                      4                                      5

I strongly disagree

I strongly agree

---

**14. If my doctor recommends that I do something, I do it.**

                                                                                      

1                                      2                                      3                                      4                                      5

I strongly disagree

I strongly agree

---

**16. Sometimes I don't follow my treatment plan exactly.**

                                                                                      

1                                      2                                      3                                      4                                      5

I strongly disagree

I strongly agree

---

**17. I find it easy to get my treatment for my [health problem].**

|                          |                          |                          |                          |                          |
|--------------------------|--------------------------|--------------------------|--------------------------|--------------------------|
| <input type="checkbox"/> |
| 1                        | 2                        | 3                        | 4                        | 5                        |

I strongly disagree

I strongly agree

---

**18. I can easily pay for my treatment.**

|                          |                          |                          |                          |                          |
|--------------------------|--------------------------|--------------------------|--------------------------|--------------------------|
| <input type="checkbox"/> |
| 1                        | 2                        | 3                        | 4                        | 5                        |

I strongly disagree

I strongly agree

---

**19. I am able to follow my treatment plan.**

|                          |                          |                          |                          |                          |
|--------------------------|--------------------------|--------------------------|--------------------------|--------------------------|
| <input type="checkbox"/> |
| 1                        | 2                        | 3                        | 4                        | 5                        |

I strongly disagree

I strongly agree

---

**21. My [health problem] has led to financial problems.**

|                          |                          |                          |                          |                          |
|--------------------------|--------------------------|--------------------------|--------------------------|--------------------------|
| <input type="checkbox"/> |
| 1                        | 2                        | 3                        | 4                        | 5                        |

I strongly disagree

I strongly agree

---

**22. I find it easy to follow my treatment plan when I am not at home.**

|                          |                          |                          |                          |                          |
|--------------------------|--------------------------|--------------------------|--------------------------|--------------------------|
| <input type="checkbox"/> |
| 1                        | 2                        | 3                        | 4                        | 5                        |

I strongly disagree

I strongly agree

---

**24. I find it easy to manage the different medications I take .**

|                          |                          |                          |                          |                          |
|--------------------------|--------------------------|--------------------------|--------------------------|--------------------------|
| <input type="checkbox"/> |
| 1                        | 2                        | 3                        | 4                        | 5                        |

I strongly disagree

I strongly agree

---

**27. I believe I can stop my treatment for my [health problem] when I feel better.**

|                          |                          |                          |                          |                          |
|--------------------------|--------------------------|--------------------------|--------------------------|--------------------------|
| <input type="checkbox"/> |
| 1                        | 2                        | 3                        | 4                        | 5                        |

I strongly disagree

I strongly agree

---

**28. I am worried about taking medications.**

|                          |                          |                          |                          |                          |
|--------------------------|--------------------------|--------------------------|--------------------------|--------------------------|
| <input type="checkbox"/> |
| 1                        | 2                        | 3                        | 4                        | 5                        |

I strongly disagree

I strongly agree

---

---

**33. I completely understand my [health problem].**

1

2

3

4

5

I strongly disagree

I strongly agree

---

**36. My treatment helps my [health problem].**

1

2

3

4

5

I strongly disagree

I strongly agree

---

**39. My [health problem] is likely to get worse if I don't follow my treatment plan.**

1

2

3

4

5

I strongly disagree

I strongly agree

---

# THE OBSERVIA SPUR QUESTIONNAIRE

## Short form - 6 items

### THE OBSERVIA TREATMENT BEHAVIOR QUESTIONNAIRE

*For each sentence, please tick the box that best applied to you.*

---

**2. My [health problem] affects my social life.**

1

2

3

4

5

I strongly disagree

I strongly agree

---

**9. It is essential that I follow my treatment plan.**

1

2

3

4

5

I strongly disagree

I strongly agree

---

**19. I am able to follow my treatment plan.**

1

2

3

4

5

I strongly disagree

I strongly agree

---

**21. My [health problem] has led to financial problems.**

1

2

3

4

5

I strongly disagree

I strongly agree

---

**36. My treatment helps my [health problem].**

1

2

3

4

5

I strongly disagree

I strongly agree

---

**39. My [health problem] is likely to get worse if I don't follow my treatment plan.**

1

2

3

4

5

I strongly disagree

I strongly agree

---
